# Supplementary material for: Preparation of hollow silica spheres with holes on the shells
Source: Royal Society of Chemistry journal article supplement (doi:10.1039/b903859k), 2009-01-01
Supplement: b903859k.pdf [file b903859k.pdf]

## Preparation of hollow silica spheres with holes on the shells

Yuanli Chen, Yi Li, Yuxia Chen, Xiaojuan Liu, Ming Zhang, Baozong Li and Yonggang Yang\*

*Key Laboratory of Organic Synthesis of Jiangsu Province, College of Chemistry and Chemical Engineering, Suzhou University, Suzhou 215123, P.R. China.*

E-mail: ygyang@suda.edu.cn

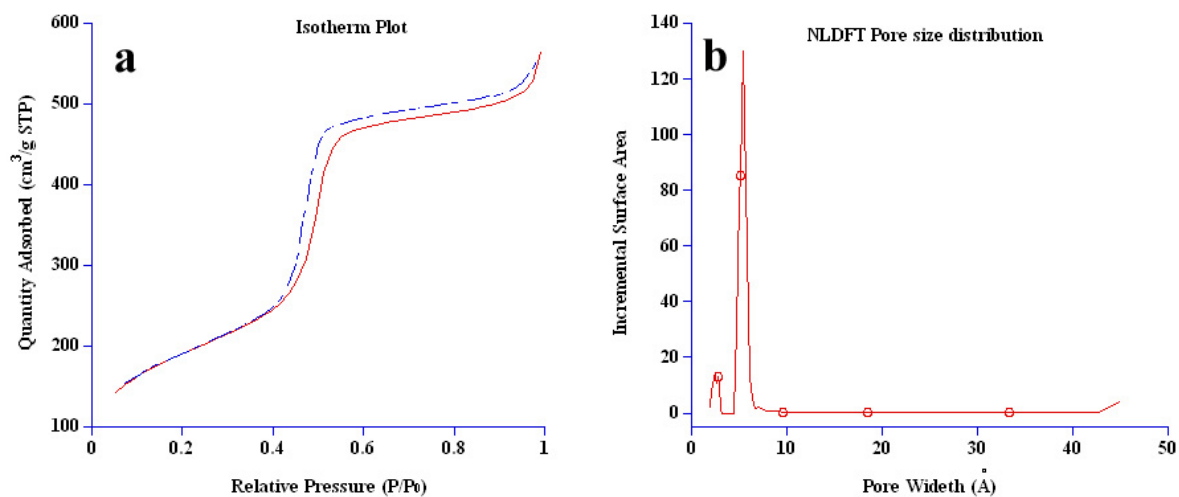

**Figure S1.** The nitrogen adsorption-desorption isotherm plot (a) and NLDFT pore-size distribution at adsorption branch (b) of the calcined hollow silica spheres.

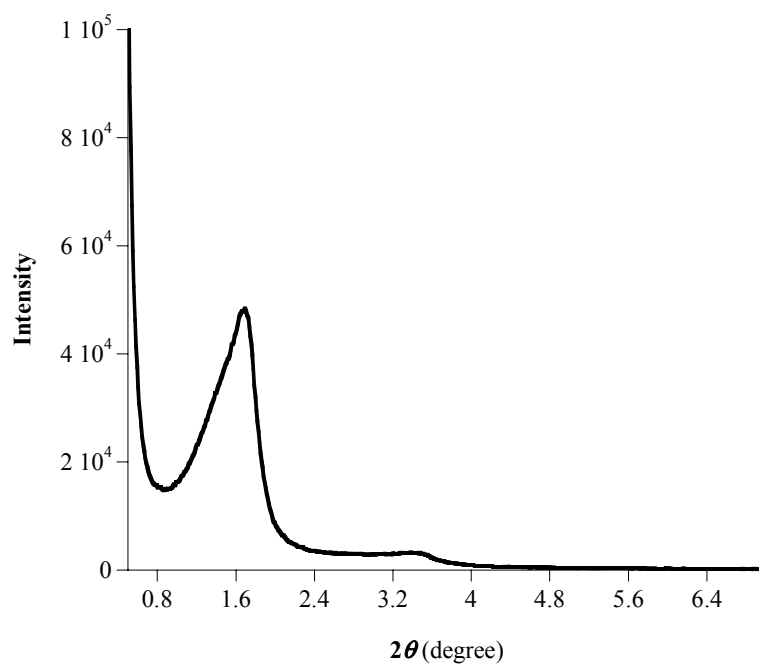

**Figure S2.** SAXRD pattern of mesoporous hollow silica shells.

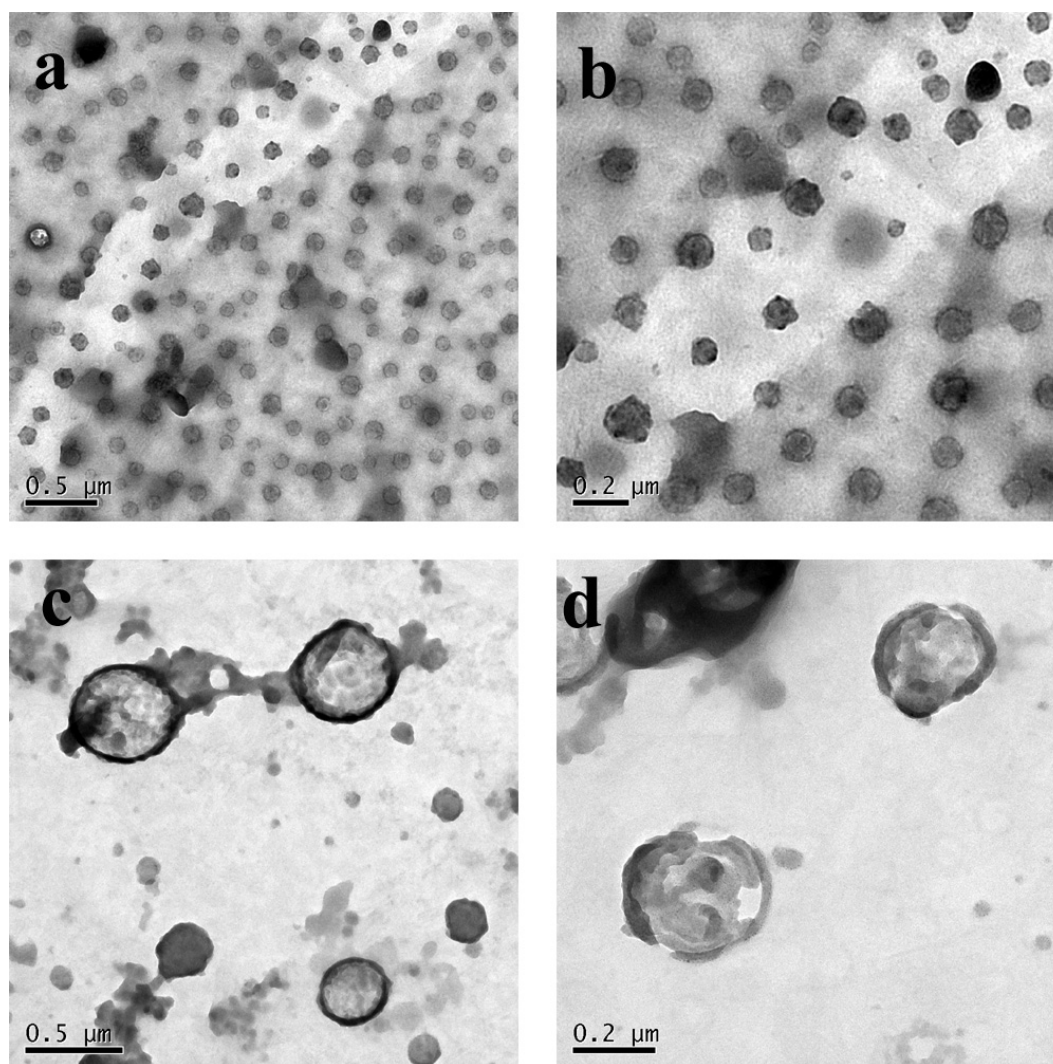

**Figure S3.** TEM images of the reaction mixture at 280 s.

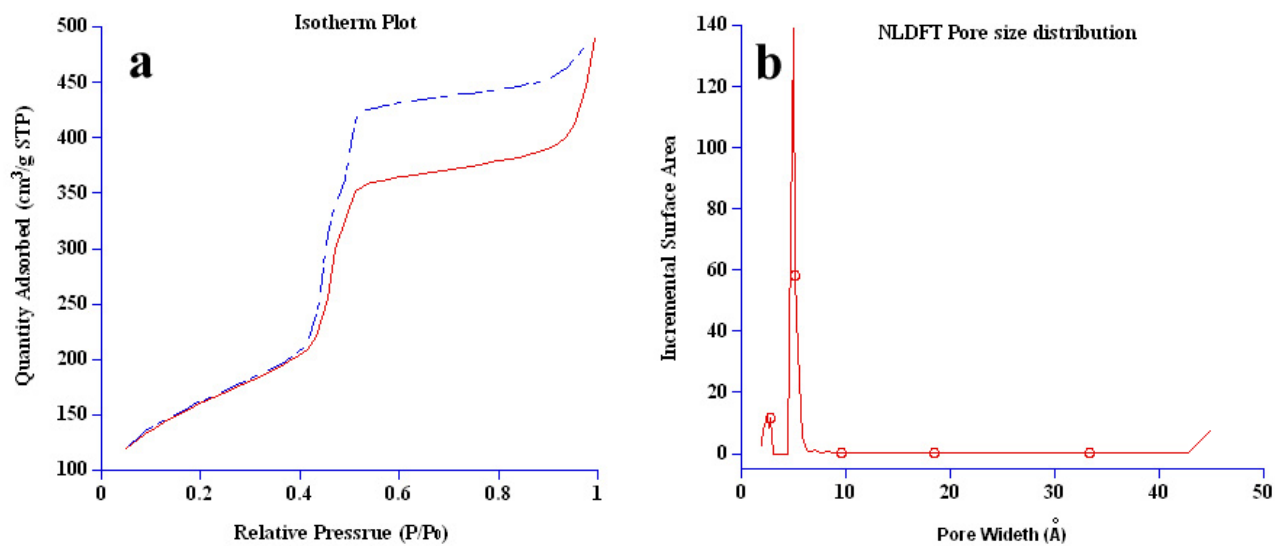

**Figure S4.** The nitrogen adsorption-desorption isotherm plot (a) and NLDFT pore-size distribution at adsorption branch (b) of the calcined hollow silica spheres.

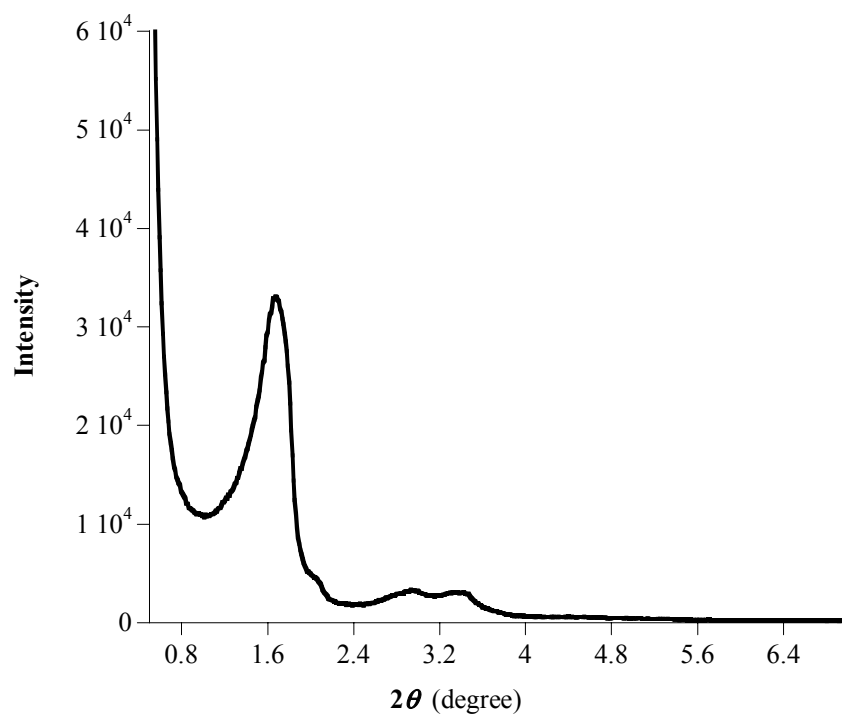

**Figure S5.** SAXRD pattern of mesoporous hollow silica shells.

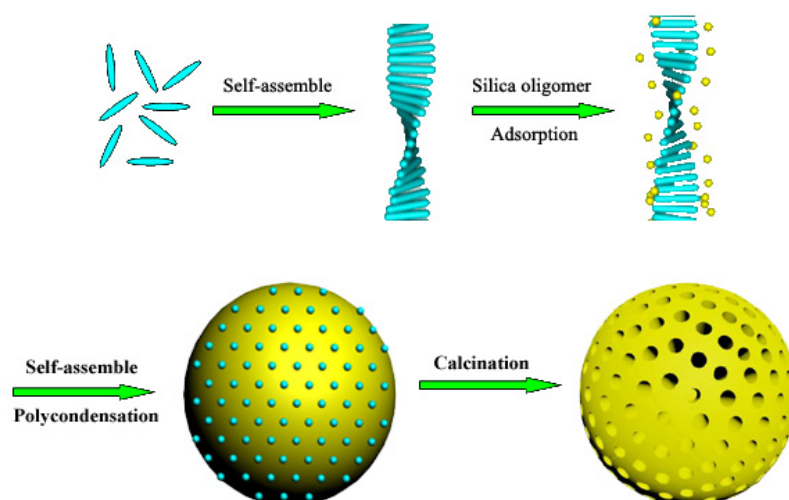

**Figure S6** Schematic presentation of the formation of hollow silica spheres.

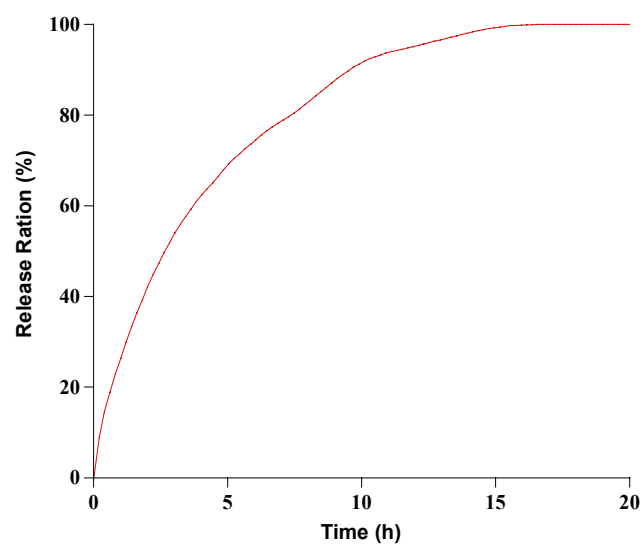

**Figure S7.** Controlled release behaviour of the mesoporous hollow silica shells prepared in the mixture of 1,4-dioxane and water.
